# Supplementary material
Source: Research Square preprint supplement (doi:10.21203/rs.3.rs-9171076/v1)
Supplement: Supplementary file 1 [file e87fb77b535a41ace616fe77.pdf]

# Supplementary Material

## Reclassifying Assay-Intrinsic HLA Reactivity Expands Donor Availability Without Short-Term Allograft Risk

A. Mallone<sup>1</sup>, T. Yuan<sup>1</sup>, F. Rössler<sup>2</sup>, K. Hubel<sup>2</sup>, D. Harmacek<sup>2</sup>, L. Frischknecht<sup>1</sup> and J. Nilsson<sup>1</sup>

1. Department of Immunology, University Hospital of Zurich, Zurich, Switzerland

2. Department of Nephrology, University Hospital of Zurich, Zurich, Switzerland

### Table of Contents

- Supplementary Figure 1
- Supplementary Table 1
- Supplementary Table 2
- Supplementary Table 3
- Supplementary Table 4

34  
35  
36  
37  
38  
39  
40  
41  
42  
43  
44  
45  
46  
47  
48  
49  
50  
51  
52  
53  
54  
55  
56  
57  
58  
59  
60  
61  
62  
63  
64  
65  
66  
67  
68  
69  
70

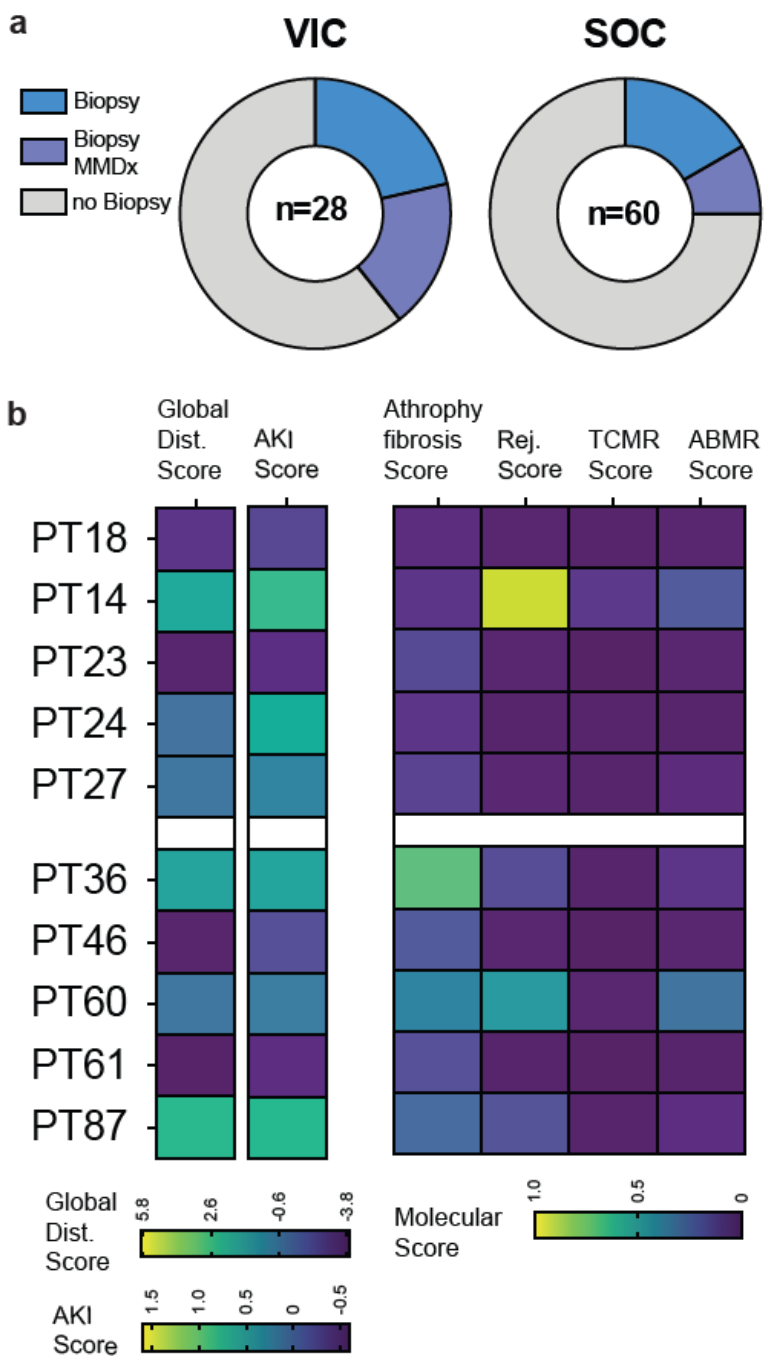

**Supplementary Figure 1. Biopsy availability and molecular injury assessment by MMDx.** (a) Proportion of patients undergoing kidney allograft biopsy within the first year post-transplant in the VIC and SOC cohorts. Inner segments indicate biopsies with available Molecular Microscope Diagnostic System (MMDx) data (Biopsy MMDx). (b) Heatmap representation of MMDx-derived molecular injury and rejection scores in biopsied patients with available MMDx data. Injury-related scores include global disturbance score, acute kidney injury (AKI) score, and atrophy-fibrosis score. Rejection-related scores include composite rejection score, T cell-mediated rejection (TCMR) score, and antibody-mediated rejection (ABMR) score. Scores are shown as continuous values, with higher values indicating greater molecular injury or higher probability of rejection.

71  
72  
73  
74  
75  
76  
77  
78  
79  
80  
81  
82  
83  
84  
85  
86  
87  
88  
89  
90  
91  
92  
93  
94  
95  
96  
97  
98  
99  
100  
101  
102  
103  
104

| ID   | Cohort | Rec. BG | Rec. Age | Rec. Sex | Donor          | PIRCHE score | PIRCHE comment    | Donor BG | Donor Age | Donor sex |
|------|--------|---------|----------|----------|----------------|--------------|-------------------|----------|-----------|-----------|
| PT1  | VIC    | A pos   | 27       | M        | Living Donor   | 5            | low risk          | A pos    | 61        | F         |
| PT2  | VIC    | O pos   | 5        | M        | Living Donor   | 37.03        | intermediate risk | O pos    | 41        | M         |
| PT3  | VIC    | A pos   | 20       | F        | Deceased Donor | 129.9        | high risk         | O pos    | 55        | M         |
| PT4  | VIC    | O neg   | 5        | F        | Deceased Donor | 76           | intermediate risk | O pos    | 23        | M         |
| PT5  | VIC    | O pos   | 58       | F        | Deceased Donor | 66.67        | intermediate risk | O pos    | 68        | F         |
| PT6  | VIC    | B pos   | 51       | F        | Deceased Donor | 43.98        | intermediate risk | O pos    | 33        | M         |
| PT7  | VIC    | AB pos  | 48       | F        | Deceased Donor | 92.64        | high risk         | AB pos   | 40        | F         |
| PT8  | VIC    | B pos   | 72       | F        | Deceased Donor | 85.56        | intermediate risk | B pos    | 57        | M         |
| PT9  | VIC    | O pos   | 57       | M        | Deceased Donor | 54.74        | intermediate risk | O neg    | 39        | F         |
| PT10 | VIC    | A pos   | 33       | F        | Deceased Donor | 73.1         | intermediate risk | A pos    | 18        | M         |
| PT11 | VIC    | A pos   | 36       | M        | Deceased Donor | 93.33        | high risk         | A neg    | 44        | F         |
| PT12 | VIC    | AB pos  | 48       | M        | Deceased Donor | 150.54       | high risk         | AB neg   | 55        | M         |
| PT13 | VIC    | B pos   | 20       | M        | Deceased Donor | 106.74       | high risk         | B pos    | 43        | M         |
| PT14 | VIC    | O pos   | 71       | F        | Deceased Donor | 55.54        | intermediate risk | O pos    | 76        | M         |
| PT15 | VIC    | A pos   | 47       | M        | Deceased Donor | 36.43        | intermediate risk | O pos    | 51        | M         |
| PT16 | VIC    | A pos   | 47       | M        | Deceased Donor | 86           | intermediate risk | A pos    | 54        | M         |
| PT17 | VIC    | A neg   | 35       | M        | Deceased Donor | 27.8         | low risk          | A pos    | 52        | M         |
| PT18 | VIC    | A pos   | 34       | F        | Deceased Donor | 126.4        | high risk         | A pos    | 49        | M         |
| PT19 | VIC    | B pos   | 68       | M        | Deceased Donor | 71.98        | intermediate risk | B neg    | 69        | F         |
| PT20 | VIC    | A pos   | 31       | F        | Living Donor   | 90.93        | high risk         | A pos    | 57        | M         |
| PT21 | VIC    | A pos   | 35       | M        | Deceased Donor | 68.74        | intermediate risk | A pos    | 42        | F         |
| PT22 | VIC    | A pos   | 44       | F        | Deceased Donor | 48.03        | intermediate risk | A pos    | 33        | M         |
| PT23 | VIC    | O pos   | 35       | F        | Living Donor   | 119.99       | high risk         | O pos    | 32        | F         |
| PT24 | VIC    | O neg   | 61       | M        | Deceased Donor | 70.19        | intermediate risk | O pos    | 63        | F         |
| PT25 | VIC    | O pos   | 67       | M        | Deceased Donor | 142.84       | high risk         | O pos    | 53        | M         |
| PT26 | VIC    | O pos   | 51       | F        | Deceased Donor | 92           | high risk         | O pos    | 26        | M         |
| PT27 | VIC    | A pos   | 48       | F        | Deceased Donor | 56.22        | intermediate risk | A pos    | 13        | M         |
| PT28 | VIC    | A pos   | 68       | M        | Deceased Donor | 148.67       | high risk         | A neg    | 49        | M         |
| PT29 | SOC    | B pos   | 19       | F        | Deceased Donor | 35.61        | intermediate risk | B pos    | 43        | M         |
| PT30 | SOC    | A pos   | 38       | F        | Deceased Donor | 41.9         | intermediate risk | A pos    | 26        | F         |
| PT31 | SOC    | A pos   | 58       | F        | Living Donor   | 0            | low risk          | A pos    | 56        | F         |
| PT32 | SOC    | O pos   | 11       | F        | Deceased Donor | 119.25       | high risk         | O pos    | 35        | M         |
| PT33 | SOC    | A pos   | 33       | F        | Deceased Donor | 67           | intermediate risk | A pos    | 28        | M         |
| PT34 | SOC    | O pos   | 33       | F        | Deceased Donor | 53.1         | intermediate risk | O pos    | 64        | F         |
| PT35 | SOC    | O pos   | 47       | F        | Deceased Donor | 91           | high risk         | O pos    | 49        | M         |
| PT36 | SOC    | A pos   | 49       | F        | Deceased Donor | 112.31       | high risk         | A neg    | 56        | M         |
| PT37 | SOC    | AB neg  | 55       | F        | Deceased Donor | 87.14        | intermediate risk | AB neg   | 51        | M         |
| PT38 | SOC    | A pos   | 70       | F        | Deceased Donor | 70.47        | intermediate risk | A pos    | 72        | F         |
| PT39 | SOC    | O pos   | 48       | F        | Living Donor   | 155.62       | high risk         | B pos    | 49        | M         |
| PT40 | SOC    | B pos   | 68       | F        | Deceased Donor | 89.12        | intermediate risk | B pos    | 60        | F         |
| PT41 | SOC    | O pos   | 74       | F        | Deceased Donor | 30.02        | low risk          | O pos    | 33        | M         |
| PT42 | SOC    | B pos   | 68       | F        | Deceased Donor | 139.87       | high risk         | B pos    | 47        | F         |
| PT43 | SOC    | A neg   | 55       | F        | Living Donor   | 43.33        | intermediate risk | A pos    | 59        | M         |
| PT44 | SOC    | A pos   | 67       | F        | Deceased Donor | 89           | high risk         | A pos    | 53        | M         |
| PT45 | SOC    | A pos   | 25       | F        | Living Donor   | 77.83        | intermediate risk | A pos    | 57        | F         |
| PT46 | SOC    | A pos   | 53       | F        | Living Donor   | 136.66       | high risk         | A pos    | 52        | M         |
| PT47 | SOC    | A pos   | 52       | F        | Deceased Donor | 120.53       | high risk         | A pos    | 58        | M         |
| PT48 | SOC    | A pos   | 50       | F        | Deceased Donor | 114.96       | high risk         | A pos    | 62        | M         |
| PT49 | SOC    | O pos   | 59       | F        | Deceased Donor | 51.87        | intermediate risk | O pos    | 55        | M         |
| PT50 | SOC    | A pos   | 60       | F        | Deceased Donor | 109.46       | high risk         | A pos    | 53        | F         |
| PT51 | SOC    | O pos   | 59       | F        | Deceased Donor | 70.29        | intermediate risk | O pos    | 69        | F         |
| PT52 | SOC    | AB neg  | 47       | F        | Deceased Donor | 104.31       | high risk         | AB pos   | 47        | M         |
| PT53 | SOC    | O neg   | 67       | F        | Living Donor   | 106          | high risk         | O pos    | 59        | M         |
| PT54 | SOC    | A neg   | 69       | F        | Living Donor   | 68           | intermediate risk | A pos    | 51        | M         |
| PT55 | SOC    | O neg   | 56       | F        | Deceased Donor | 59           | intermediate risk | O pos    | 68        | F         |
| PT56 | SOC    | O pos   | 73       | F        | Living Donor   | 86.2         | intermediate risk | O pos    | 74        | M         |
| PT57 | SOC    | A pos   | 21       | F        | Deceased Donor | 112.19       | high risk         | A pos    | 43        | M         |
| PT58 | SOC    | O pos   | 64       | F        | Deceased Donor | 82.88        | intermediate risk | O pos    | 5         | F         |
| PT59 | SOC    | AB pos  | 50       | M        | Deceased Donor | 58           | intermediate risk | AB pos   | 58        | F         |
| PT60 | SOC    | B pos   | 66       | M        | Deceased Donor | 141.29       | high risk         | B pos    | 48        | F         |
| PT61 | SOC    | A pos   | 33       | M        | Deceased Donor | 117.32       | high risk         | A pos    | 53        | M         |
| PT62 | SOC    | O pos   | 57       | M        | Deceased Donor | 57.9         | intermediate risk | O pos    | 50        | M         |
| PT63 | SOC    | O pos   | 69       | M        | Deceased Donor | 92.25        | high risk         | O neg    | 77        | F         |
| PT64 | SOC    | O neg   | 29       | M        | Living Donor   | 55.92        | intermediate risk | O pos    | 49        | F         |
| PT65 | SOC    | A pos   | 45       | M        | Deceased Donor | 120.48       | high risk         | A neg    | 56        | M         |
| PT66 | SOC    | O pos   | 27       | M        | Deceased Donor | 86.97        | intermediate risk | O neg    | 48        | M         |
| PT67 | SOC    | O pos   | 73       | M        | Deceased Donor | 41.23        | intermediate risk | O pos    | 33        | M         |
| PT68 | SOC    | A pos   | 62       | M        | Deceased Donor | 77.22        | intermediate risk | A pos    | 72        | M         |
| PT69 | SOC    | A neg   | 63       | M        | Deceased Donor | 138          | high risk         | A pos    | 51        | F         |
| PT70 | SOC    | AB pos  | 60       | M        | Deceased Donor | 73.28        | intermediate risk | AB pos   | 40        | F         |
| PT71 | SOC    | O pos   | 68       | M        | Deceased Donor | 146.59       | high risk         | O pos    | 59        | M         |
| PT72 | SOC    | O pos   | 75       | M        | Deceased Donor | 124.26       | high risk         | O pos    | 69        | M         |
| PT73 | SOC    | A neg   | 67       | M        | Deceased Donor | 89.57        | intermediate risk | A neg    | 32        | M         |
| PT74 | SOC    | A pos   | 32       | M        | Living Donor   | 46           | intermediate risk | A pos    | 58        | M         |
| PT75 | SOC    | O pos   | 77       | M        | Deceased Donor | 64.53        | intermediate risk | O pos    | 73        | M         |
| PT76 | SOC    | A pos   | 63       | M        | Living Donor   | 135.78       | high risk         | O pos    | 61        | F         |
| PT77 | SOC    | A pos   | 69       | M        | Deceased Donor | 95.31        | high risk         | A pos    | 48        | F         |
| PT78 | SOC    | AB pos  | 52       | M        | Deceased Donor | 83.4         | intermediate risk | AB pos   | 26        | M         |
| PT79 | SOC    | A pos   | 71       | M        | Deceased Donor | 58.62        | intermediate risk | A pos    | 72        | M         |
| PT80 | SOC    | A pos   | 66       | M        | Deceased Donor | 36.1         | intermediate risk | A pos    | 67        | M         |
| PT81 | SOC    | O neg   | 49       | M        | Living Donor   | 52           | intermediate risk | O pos    | 71        | F         |
| PT82 | SOC    | O pos   | 55       | M        | Deceased Donor | 118.38       | high risk         | O pos    | 69        | F         |
| PT83 | SOC    | O pos   | 47       | M        | Living Donor   | 57.05        | intermediate risk | O pos    | 69        | F         |
| PT84 | SOC    | O pos   | 34       | M        | Living Donor   | 30.63        | low risk          | A pos    | 53        | F         |
| PT85 | SOC    | O neg   | 70       | M        | Deceased Donor | 20.98        | low risk          | O pos    | 73        | F         |
| PT86 | SOC    | A pos   | 54       | M        | Deceased Donor | 26.44        | low risk          | A neg    | 38        | F         |
| PT87 | SOC    | O pos   | 70       | M        | Deceased Donor | 155.59       | high risk         | O pos    | 72        | F         |
| PT88 | SOC    | B pos   | 73       | M        | Deceased Donor | 111.57       | high risk         | B pos    | 73        | M         |

Supplementary Table 1. Detailed characteristics of donors and recipients.

105  
106  
107  
108  
109  
110  
111  
112  
113  
114  
115  
116  
117  
118  
119  
120  
121  
122  
123  
124  
125  
126  
127  
128  
129  
130  
131  
132  
133  
134  
135  
136  
137  
138  
139

| Bead nr. | Abbreviated Specificity         | LS1A04_011 | LS1A04_012 | LS1A04_013 | LS1A04_14 | LS1A04_15 | LS1A04_16 |
|----------|---------------------------------|------------|------------|------------|-----------|-----------|-----------|
|          | patients tested (total n = 741) | 37         | 66         | 127        | 290       | 182       | 39        |
| 3        | A1                              | 0%         | 0%         | 2%         | 2%        | 9%        | 5%        |
| 4        | A2                              | 3%         | 0%         | 0%         | 4%        | 3%        | 5%        |
| 5        | A2                              | 0%         | 0%         | 1%         | 3%        | 4%        | 5%        |
| 6        | A2                              | 0%         | 2%         | 1%         | 3%        | 4%        | 3%        |
| 7        | A3                              | 0%         | 2%         | 0%         | 2%        | 2%        | 5%        |
| 8        | A11                             | 5%         | 0%         | 0%         | 0%        | 0%        | 5%        |
| 9        | A11                             | 3%         | 0%         | 4%         | 4%        | 13%       | 21%       |
| 10       | A23                             | 0%         | 0%         | 3%         | 3%        | 5%        | 15%       |
| 11       | A24                             | 0%         | 0%         | 2%         | 7%        | 14%       | 26%       |
| 12       | A24                             | 5%         | 0%         | 6%         | 8%        | 8%        | 15%       |
| 13       | A25                             | 11%        | 0%         | 3%         | 4%        | 4%        | 13%       |
| 14       | A26                             | 0%         | 0%         | 1%         | 5%        | 7%        | 5%        |
| 15       | A29                             | 8%         | 12%        | 5%         | 8%        | 10%       | 15%       |
| 16       | --B27--Bw4                      | 0%         | 0%         | 0%         | 4%        | 3%        | 5%        |
| 17       | A29                             | 3%         | 5%         | 3%         | 6%        | 16%       | 21%       |
| 18       | A30                             | 5%         | 2%         | 0%         | 5%        | 9%        | 3%        |
| 19       | A30                             | 5%         | 2%         | 0%         | 4%        | 5%        | 3%        |
| 20       | A31                             | 5%         | 3%         | 2%         | 7%        | 5%        | 5%        |
| 21       | A32                             | 0%         | 3%         | 2%         | 4%        | 4%        | 3%        |
| 22       | A33                             | 0%         | 0%         | 2%         | 3%        | 3%        | 5%        |
| 23       | A34                             | 14%        | 5%         | 8%         | 10%       | 16%       | 23%       |
| 24       | A34                             | 5%         | 0%         | 0%         | 0%        | 2%        | 5%        |
| 25       | A36                             | 0%         | 0%         | 2%         | 3%        | 5%        | 8%        |
| 26       | A43                             | 8%         | 2%         | 2%         | 11%       | 14%       | 15%       |
| 27       | A66                             | 8%         | 2%         | 2%         | 10%       | 19%       | 15%       |
| 28       | A66                             | 14%        | 0%         | 3%         | 6%        | 15%       | 13%       |
| 29       | A68                             | 0%         | 0%         | 2%         | 3%        | 2%        | 0%        |
| 30       | A68                             | 0%         | 0%         | 0%         | 1%        | 2%        | 8%        |
| 31       | A69                             | 0%         | 0%         | 1%         | 1%        | 2%        | 5%        |
| 32       | A74                             | 0%         | 0%         | 0%         | 0%        | 1%        | 3%        |
| 33       | A80                             | 3%         | 5%         | 4%         | 12%       | 18%       | 21%       |
| 34       | --B7--Bw6                       | 0%         | 0%         | 0%         | 0%        | 1%        | 15%       |
| 35       | --B8--Bw6                       | 0%         | 5%         | 9%         | 8%        | 9%        | 13%       |
| 36       | --B13--Bw4                      | 0%         | 3%         | 0%         | 4%        | 9%        | 5%        |
| 37       | --B64--Bw6                      | 0%         | 0%         | 0%         | 0%        | 1%        | 0%        |
| 38       | --B65--Bw6                      | 0%         | 0%         | 0%         | 0%        | 0%        | 0%        |
| 40       | --B62--Bw6                      | 0%         | 5%         | 4%         | 2%        | 1%        | 0%        |
| 41       | --B75--Bw6                      | 3%         | 0%         | 3%         | 7%        | 8%        | 8%        |
| 42       | --B72--Bw6                      | 0%         | 2%         | 4%         | 1%        | 1%        | 0%        |
| 43       | --B71--Bw6                      | 0%         | 5%         | 6%         | 1%        | 1%        | 3%        |
| 44       | --B76--Bw6                      | 19%        | 6%         | 18%        | 10%       | 19%       | 36%       |
| 45       | --B77--Bw4                      | 0%         | 0%         | 2%         | 2%        | 1%        | 3%        |
| 46       | --B63--Bw4                      | 11%        | 12%        | 11%        | 4%        | 3%        | 10%       |
| 47       | --B18--Bw6                      | 0%         | 0%         | 0%         | 1%        | 1%        | 3%        |
| 48       | --B27--Bw6                      | 0%         | 0%         | 2%         | 6%        | 5%        | 5%        |
| 49       | --B35--Bw6                      | 0%         | 0%         | 1%         | 0%        | 2%        | 5%        |
| 50       | --B37--Bw4                      | 0%         | 11%        | 12%        | 8%        | 19%       | 18%       |
| 51       | --B38--Bw4                      | 0%         | 0%         | 0%         | 0%        | 0%        | 0%        |
| 52       | --B39--Bw6                      | 0%         | 0%         | 0%         | 0%        | 0%        | 0%        |
| 53       | --B60--Bw6                      | 0%         | 0%         | 0%         | 5%        | 4%        | 5%        |
| 54       | --B61--Bw6                      | 0%         | 2%         | 1%         | 3%        | 1%        | 3%        |
| 55       | --B41--Bw6                      | 0%         | 0%         | 2%         | 3%        | 1%        | 3%        |
| 56       | --B42--Bw6                      | 8%         | 0%         | 0%         | 1%        | 2%        | 0%        |
| 57       | --B44--Bw4                      | 0%         | 0%         | 2%         | 6%        | 8%        | 5%        |
| 58       | --B44--Bw4                      | 0%         | 0%         | 0%         | 3%        | 6%        | 3%        |
| 59       | --B45--Bw6                      | 3%         | 2%         | 4%         | 5%        | 9%        | 5%        |
| 60       | --B49--Bw4                      | 3%         | 6%         | 9%         | 3%        | 1%        | 5%        |
| 61       | --B47--Bw4                      | 0%         | 0%         | 2%         | 2%        | 6%        | 8%        |
| 62       | --B48--Bw6                      | 0%         | 0%         | 0%         | 1%        | 1%        | 0%        |
| 63       | --B46--Bw6                      | 3%         | 3%         | 4%         | 7%        | 12%       | 26%       |
| 64       | --B50--Bw6                      | 0%         | 3%         | 6%         | 1%        | 1%        | 5%        |
| 65       | --B51--Bw4                      | 0%         | 0%         | 3%         | 1%        | 2%        | 5%        |
| 66       | --B51--Bw4                      | 0%         | 0%         | 2%         | 0%        | 1%        | 3%        |
| 67       | --B52--Bw4                      | 0%         | 0%         | 3%         | 2%        | 2%        | 8%        |
| 68       | --B53--Bw4                      | 0%         | 2%         | 2%         | 1%        | 1%        | 3%        |
| 69       | --B54--Bw6                      | 3%         | 2%         | 2%         | 2%        | 3%        | 5%        |
| 70       | --B55--Bw6                      | 0%         | 0%         | 0%         | 0%        | 1%        | 3%        |
| 71       | --B56--Bw6                      | 3%         | 8%         | 7%         | 0%        | 2%        | 0%        |
| 72       | --B57--Bw4                      | 3%         | 2%         | 3%         | 9%        | 9%        | 26%       |
| 73       | --B57--Bw4                      | 0%         | 2%         | 3%         | 9%        | 11%       | 28%       |
| 74       | --B58--Bw4                      | 0%         | 2%         | 2%         | 4%        | 7%        | 15%       |
| 75       | --B59--Bw4                      | 0%         | 2%         | 2%         | 2%        | 2%        | 13%       |
| 76       | --B67--Bw6                      | 5%         | 2%         | 11%        | 3%        | 14%       | 10%       |
| 77       | --B73--Bw6                      | 0%         | 0%         | 2%         | 4%        | 9%        | 10%       |
| 78       | --B78--Bw6                      | 0%         | 0%         | 0%         | 0%        | 3%        | 5%        |
| 79       | --B81--Bw6                      | 3%         | 3%         | 1%         | 2%        | 4%        | 3%        |
| 80       | --B82--Bw6                      | 5%         | 2%         | 2%         | 6%        | 13%       | 21%       |
| 81       | -----Cw1-                       | 3%         | 11%        | 8%         | 2%        | 10%       | 10%       |
| 82       | -----Cw2-                       | 5%         | 5%         | 5%         | 6%        | 13%       | 13%       |
| 83       | -----Cw10-                      | 0%         | 0%         | 6%         | 6%        | 12%       | 10%       |
| 84       | -----Cw9-                       | 0%         | 3%         | 8%         | 8%        | 17%       | 10%       |
| 85       | -----Cw10-                      | 0%         | 3%         | 6%         | 4%        | 12%       | 10%       |
| 86       | -----Cw4-                       | 0%         | 3%         | 7%         | 4%        | 16%       | 23%       |
| 87       | -----Cw5-                       | 3%         | 3%         | 10%        | 10%       | 8%        | 3%        |
| 88       | -----Cw6-                       | 0%         | 2%         | 4%         | 7%        | 10%       | 21%       |
| 89       | -----Cw7-                       | 0%         | 3%         | 2%         | 2%        | 6%        | 13%       |
| 90       | -----Cw8-                       | 0%         | 0%         | 2%         | 2%        | 4%        | 0%        |
| 91       | -----Cw12-                      | 5%         | 8%         | 10%        | 2%        | 4%        | 5%        |
| 92       | -----Cw17-                      | 0%         | 0%         | 2%         | 2%        | 7%        | 23%       |
| 93       | -----Cw15-                      | 5%         | 8%         | 8%         | 5%        | 5%        | 3%        |
| 94       | -----Cw16-                      | 0%         | 0%         | 2%         | 3%        | 3%        | 13%       |
| 95       | -----Cw14-                      | 3%         | 14%        | 10%        | 22%       | 42%       | 18%       |
| 96       | -----Cw18-                      | 0%         | 2%         | 6%         | 14%       | 15%       | 13%       |
| 97       | --B13--Bw4                      | 0%         | 2%         | 2%         | 4%        | 4%        | 3%        |
| 98       | --B75--Bw6                      | 0%         | 0%         | 0%         | 1%        | 2%        | 13%       |
| 99       | --B61--Bw6                      | 0%         | 0%         | 0%         | 4%        | 2%        | 3%        |
| 100      | A33                             | 0%         | 0%         | 0%         | 1%        | 3%        | 3%        |

Supplementary Table 2. Mean Class I bead reactivity (%) in non-immunized males in different One Lambda SAB assay lots.

140  
141  
142  
143  
144  
145  
146  
147  
148  
149  
150  
151  
152  
153  
154  
155  
156  
157  
158  
159  
160  
161  
162  
163  
164  
165

| Bead nr. | Abbreviated Specificity          | LS2A01NC 013 | LS2A01 014 | LS2A01 015 | LS2A01 016 | LS2A01 017 |
|----------|----------------------------------|--------------|------------|------------|------------|------------|
|          | patients tested (total n = 1004) | 48           | 121        | 297        | 381        | 157        |
| 4        | DR1.....                         | 13%          | 10%        | 7%         | 2%         | 20%        |
| 5        | DR103.....                       | 10%          | 5%         | 2%         | 2%         | 5%         |
| 6        | DR17.....                        | 4%           | 2%         | 2%         | 1%         | 1%         |
| 7        | DR18.....                        | 8%           | 7%         | 3%         | 2%         | 0%         |
| 8        | DR4.....                         | 17%          | 11%        | 2%         | 1%         | 4%         |
| 9        | DR4.....                         | 15%          | 11%        | 4%         | 2%         | 1%         |
| 10       | DR4.....                         | 4%           | 10%        | 4%         | 2%         | 10%        |
| 11       | DR4.....                         | 4%           | 6%         | 3%         | 1%         | 2%         |
| 12       | DR4.....                         | 23%          | 13%        | 2%         | 1%         | 4%         |
| 13       | DR7.....                         | 21%          | 9%         | 2%         | 2%         | 10%        |
| 14       | DR8.....                         | 0%           | 3%         | 2%         | 2%         | 0%         |
| 15       | DR9.....                         | 2%           | 6%         | 4%         | 4%         | 1%         |
| 16       | DR9.....                         | 2%           | 5%         | 4%         | 3%         | 7%         |
| 17       | DR10.....                        | 6%           | 10%        | 2%         | 1%         | 8%         |
| 18       | DR11.....                        | 6%           | 7%         | 3%         | 1%         | 0%         |
| 19       | DR11.....                        | 0%           | 3%         | 1%         | 1%         | 4%         |
| 20       | DR12.....                        | 4%           | 8%         | 1%         | 2%         | 10%        |
| 21       | DR12.....                        | 4%           | 8%         | 3%         | 2%         | 9%         |
| 22       | DR13.....                        | 0%           | 5%         | 6%         | 1%         | 0%         |
| 23       | DR13.....                        | 0%           | 5%         | 3%         | 1%         | 1%         |
| 24       | DR14.....                        | 4%           | 6%         | 3%         | 0%         | 1%         |
| 25       | DR14.....                        | 0%           | 5%         | 3%         | 1%         | 0%         |
| 26       | DR14.....                        | 0%           | 3%         | 2%         | 0%         | 1%         |
| 27       | DR15.....                        | 2%           | 5%         | 1%         | 0%         | 3%         |
| 28       | DR15.....                        | 2%           | 4%         | 3%         | 1%         | 4%         |
| 29       | DR15.....                        | 0%           | 2%         | 2%         | 0%         | 2%         |
| 30       | DR16.....                        | 0%           | 4%         | 2%         | 0%         | 2%         |
| 31       | DR16.....                        | 0%           | 5%         | 2%         | 1%         | 2%         |
| 32       | --DR52.....                      | 2%           | 4%         | 3%         | 3%         | 1%         |
| 33       | --DR52.....                      | 15%          | 11%        | 7%         | 2%         | 8%         |
| 34       | --DR52.....                      | 0%           | 3%         | 2%         | 3%         | 1%         |
| 35       | --DR53.....                      | 19%          | 20%        | 8%         | 8%         | 21%        |
| 36       | --DR53.....                      | 17%          | 12%        | 8%         | 7%         | 17%        |
| 37       | --DR51.....                      | 19%          | 8%         | 7%         | 6%         | 3%         |
| 38       | --DR51.....                      | 2%           | 9%         | 3%         | 1%         | 1%         |
| 39       | ....DQ2.....                     | 6%           | 8%         | 3%         | 2%         | 0%         |
| 40       | ....DQ2.....                     | 6%           | 10%        | 3%         | 2%         | 6%         |
| 41       | ....DQ2.....                     | 8%           | 4%         | 0%         | 2%         | 1%         |
| 42       | ....DQ2.....                     | 13%          | 12%        | 4%         | 7%         | 8%         |
| 43       | ....DQ2.....                     | 6%           | 7%         | 3%         | 1%         | 1%         |
| 44       | ....DQ4.....                     | 2%           | 8%         | 2%         | 2%         | 6%         |
| 45       | ....DQ4.....                     | 0%           | 5%         | 1%         | 2%         | 10%        |
| 46       | ....DQ4.....                     | 0%           | 7%         | 2%         | 2%         | 8%         |
| 47       | ....DQ4.....                     | 0%           | 7%         | 2%         | 1%         | 8%         |
| 48       | ....DQ5.....                     | 2%           | 7%         | 2%         | 2%         | 8%         |
| 49       | ....DQ5.....                     | 0%           | 9%         | 3%         | 2%         | 6%         |
| 50       | ....DQ6.....                     | 0%           | 6%         | 1%         | 2%         | 6%         |
| 51       | ....DQ6.....                     | 2%           | 3%         | 3%         | 2%         | 5%         |
| 52       | ....DQ6.....                     | 4%           | 1%         | 2%         | 3%         | 4%         |
| 53       | ....DQ6.....                     | 15%          | 3%         | 3%         | 3%         | 6%         |
| 54       | ....DQ6.....                     | 0%           | 9%         | 3%         | 3%         | 4%         |
| 55       | ....DQ6.....                     | 0%           | 6%         | 1%         | 1%         | 4%         |
| 56       | ....DQ7.....                     | 8%           | 12%        | 2%         | 5%         | 10%        |
| 57       | ....DQ7.....                     | 15%          | 10%        | 2%         | 3%         | 6%         |
| 58       | ....DQ7.....                     | 21%          | 12%        | 4%         | 4%         | 12%        |
| 59       | ....DQ7.....                     | 19%          | 12%        | 4%         | 4%         | 8%         |
| 60       | ....DQ7.....                     | 10%          | 10%        | 3%         | 3%         | 5%         |
| 61       | ....DQ8.....                     | 2%           | 3%         | 2%         | 3%         | 5%         |
| 62       | ....DQ8.....                     | 4%           | 6%         | 4%         | 5%         | 8%         |
| 63       | ....DQ8.....                     | 2%           | 2%         | 3%         | 6%         | 5%         |
| 64       | ....DQ9.....                     | 2%           | 3%         | 1%         | 7%         | 3%         |
| 65       | ....DQ9.....                     | 0%           | 3%         | 3%         | 8%         | 11%        |
| 66       | ....DQ9.....                     | 2%           | 2%         | 3%         | 5%         | 6%         |
| 67       | ....DP1.....                     | 8%           | 0%         | 1%         | 6%         | 13%        |
| 68       | ....DP1.....                     | 21%          | 24%        | 15%        | 17%        | 41%        |
| 69       | ....DP2.....                     | 0%           | 1%         | 0%         | 1%         | 3%         |
| 70       | ....DP5.....                     | 15%          | 25%        | 6%         | 10%        | 17%        |
| 71       | ....DP3.....                     | 17%          | 12%        | 4%         | 3%         | 21%        |
| 72       | ....DP3.....                     | 0%           | 1%         | 2%         | 1%         | 3%         |
| 73       | ....DP3.....                     | 0%           | 2%         | 1%         | 1%         | 1%         |
| 74       | ....DP4.....                     | 2%           | 0%         | 1%         | 1%         | 4%         |
| 75       | ....DP4.....                     | 0%           | 0%         | 2%         | 2%         | 1%         |
| 76       | ....DP5.....                     | 2%           | 3%         | 1%         | 3%         | 1%         |
| 77       | ....DP6.....                     | 0%           | 2%         | 2%         | 0%         | 2%         |
| 78       | ....DP6.....                     | 2%           | 16%        | 16%        | 8%         | 12%        |
| 79       | ....DP9.....                     | 0%           | 0%         | 1%         | 1%         | 1%         |
| 80       | ....DP10.....                    | 4%           | 2%         | 2%         | 2%         | 3%         |
| 81       | ....DP11.....                    | 8%           | 2%         | 3%         | 1%         | 1%         |
| 82       | ....DP28.....                    | 2%           | 1%         | 0%         | 1%         | 1%         |
| 83       | ....DP13.....                    | 0%           | 4%         | 1%         | 1%         | 9%         |
| 84       | ....DP13.....                    | 0%           | 2%         | 1%         | 1%         | 4%         |
| 85       | ....DP13.....                    | 2%           | 5%         | 2%         | 2%         | 8%         |
| 86       | ....DP14.....                    | 4%           | 3%         | 2%         | 1%         | 20%        |
| 87       | ....DP15.....                    | 2%           | 2%         | 2%         | 1%         | 8%         |
| 88       | ....DP17.....                    | 0%           | 2%         | 2%         | 2%         | 2%         |
| 89       | ....DP18.....                    | 0%           | 0%         | 0%         | 1%         | 1%         |
| 90       | ....DP18.....                    | 0%           | 2%         | 1%         | 0%         | 0%         |
| 91       | ....DP18.....                    | 0%           | 2%         | 1%         | 1%         | 0%         |
| 92       | ....DP19.....                    | 15%          | 2%         | 0%         | 0%         | 3%         |
| 93       | ....DP20.....                    | 2%           | 1%         | 2%         | 3%         | 1%         |
| 94       | ....DP23.....                    | 2%           | 1%         | 2%         | 2%         | 10%        |
| 95       | ....DP28.....                    | 2%           | 5%         | 0%         | 1%         | 1%         |
| 96       | ....DP28.....                    | 2%           | 2%         | 0%         | 1%         | 1%         |
| 97       | ....DP11.....                    | 2%           | 10%        | 2%         | 3%         | 3%         |

166  
167

**Supplementary Table 3. Mean Class II bead reactivity (%) in non-immunized males in different One Lambda SAB assay lots.**

168  
 169  
 170  
 171  
 172  
 173  
 174  
 175  
 176  
 177  
 178  
 179  
 180  
 181  
 182  
 183  
 184  
 185  
 186  
 187  
 188  
 189  
 190  
 191  
 192  
 193  
 194  
 195

| VIC  |            |            |            | SOC  |    |            |            |
|------|------------|------------|------------|------|----|------------|------------|
|      | 3m         | 6m         | 1y         |      | 3m | 6m         | 1y         |
| PT1  | 0          | 0          | 0          | PT29 | 0  | 0          | 0          |
| PT2  | 0          | 0          | 0          | PT30 | 0  | 0          | 0          |
| PT3  | 0          | 0          | 0          | PT31 | 0  | 0          | 0          |
| PT4  | 0          | 0          | 0          | PT32 | 0  | 1          | 0          |
| PT5  | 0          | 0          | 0          | PT33 | 0  | 0          | 0          |
| PT6  | 0          | 0          | 0          | PT34 | 0  | 0          | 0          |
| PT7  | 0          | 0          | 0          | PT35 | 0  | 0          | 0          |
| PT8  | 0          | 0          | 0          | PT36 | 0  | 1          | 1          |
| PT9  | 0          | 0          | 1          | PT37 | 0  | 1          | 0          |
| PT10 | 0          | 0          | 0          | PT38 | 0  | 0          | 0          |
| PT11 | 0          | 0          | 1          | PT39 | 0  | 0          | 0          |
| PT12 | 0          | 0          | 0          | PT40 | 0  | 0          | 0          |
| PT13 | 0          | 0          | 0          | PT41 | 0  | 0          | 0          |
| PT14 | 1          | 1          | 1          | PT42 | 0  | 0          | 0          |
| PT15 | 0          | 0          | 0          | PT43 | 0  | 0          | 0          |
| PT16 | 0          | 0          | 1          | PT44 | 0  | 0          | 1          |
| PT17 | 0          | 0          | 0          | PT45 | 0  | 0          | 1          |
| PT18 | 0          | 1          | 1          | PT46 | 0  | 1          | 1          |
| PT19 | 0          | 0          | 0          | PT47 | 0  | 0          | 0          |
| PT20 | 0          | 0          | 0          | PT48 | 0  | 0          | 0          |
| PT21 | 0          | 0          | 0          | PT49 | 1  | 1          | 1          |
| PT22 | 1          | 1          | 1          | PT50 | 0  | 0          | 0          |
| PT23 | 0          | 0          | 0          | PT51 | 0  | 0          | 0          |
| PT24 | 0          | 0          | 0          | PT52 | 0  | 0          | 0          |
| PT25 | 0          | 0          | 0          | PT53 | 0  | 0          | 0          |
| PT26 | 0          | 0          | 0          | PT54 | 0  | 0          | 0          |
| PT27 | 0          | 0          | 0          | PT55 | 0  | 0          | 0          |
| PT28 | 0          | 0          | 0          | PT56 | 0  | 0          | 0          |
| sum  | 2          | 3          | 6          | PT57 | 0  | 0          | 0          |
| %    | 7.14285714 | 10.7142857 | 21.4285714 | PT58 | 0  | 0          | 0          |
|      |            |            |            | PT59 | 1  | 1          | 1          |
|      |            |            |            | PT60 | 0  | 0          | 1          |
|      |            |            |            | PT61 | 0  | 1          | 1          |
|      |            |            |            | PT62 | 0  | 0          | 0          |
|      |            |            |            | PT63 | 0  | 0          | 0          |
|      |            |            |            | PT64 | 0  | 0          | 0          |
|      |            |            |            | PT65 | 0  | 0          | 0          |
|      |            |            |            | PT66 | 0  | 0          | 1          |
|      |            |            |            | PT67 | 0  | 0          | 0          |
|      |            |            |            | PT68 | 0  | 0          | 0          |
|      |            |            |            | PT69 | 0  | 0          | 0          |
|      |            |            |            | PT70 | 0  | 0          | 0          |
|      |            |            |            | PT71 | 0  | 0          | 0          |
|      |            |            |            | PT72 | 0  | 0          | 0          |
|      |            |            |            | PT73 | 0  | 0          | 0          |
|      |            |            |            | PT74 | 1  | 1          | 1          |
|      |            |            |            | PT75 | 0  | 0          | 0          |
|      |            |            |            | PT76 | 0  | 0          | 0          |
|      |            |            |            | PT77 | 1  | 1          | 1          |
|      |            |            |            | PT78 | 1  | 1          | 1          |
|      |            |            |            | PT79 | 0  | 0          | 0          |
|      |            |            |            | PT80 | 0  | 0          | 0          |
|      |            |            |            | PT81 | 0  | 0          | 0          |
|      |            |            |            | PT82 | 0  | 0          | 0          |
|      |            |            |            | PT83 | 0  | 0          | 0          |
|      |            |            |            | PT84 | 0  | 0          | 0          |
|      |            |            |            | PT85 | 0  | 0          | 0          |
|      |            |            |            | PT86 | 1  | 1          | 1          |
|      |            |            |            | PT87 | 0  | 0          | 1          |
|      |            |            |            | PT88 | 0  | 0          | 0          |
|      |            |            |            | sum  | 6  | 11         | 14         |
|      |            |            |            | %    | 10 | 18.3333333 | 23.3333333 |

Supplementary Table 4. *De novo* donor specific antibody development in transplanted patients at 3, 6, and 12 months post-transplant.
